# Supplementary material
Source: MDPI journal article supplement (https://www.mdpi.com/1999-4907/9/11/680)
Supplement: s1 [file s1]

**Table S1.** Ecological factors from four treatments.

| Gap            | AT (°C)        | AH (%)        | SMC (%)        |
|----------------|----------------|---------------|----------------|
| G <sub>1</sub> | 26.30 ± 0.16bc | 64.33 ± 0.32b | 22.33 ± 0.03ab |
| G <sub>2</sub> | 26.72 ± 0.46b  | 63.80 ± 0.23c | 26.67 ± 0.02a  |
| G <sub>3</sub> | 27.85 ± 0.26a  | 48.27 ± 0.35d | 18.33 ± 0.03b  |
| G <sub>0</sub> | 25.96 ± 0.25c  | 66.30 ± 0.20a | 24.67 ± 0.06ab |

Remarks: AT: Air temperature; AH: Air humidity; SMC: Soil moisture content; G<sub>1</sub>: small gap; G<sub>2</sub>: medium gap; G<sub>3</sub>: large gap; G<sub>0</sub>: closed canopy. Values are the mean ± standard deviation ( $n = 3$ ). Different lowercase letters indicate significant differences among gap size (Fisher's LSD test at 0.05).
